# Supplementary material for: Comprehensive Ex Vivo Comparison of 5 Clinically Used Conduit Configurations for Valve-Sparing Aortic Root Replacement Using a 3-Dimensional–Printed Heart Simulator
Source: PubMed Central journal article supplement — Circulation. 2020 Oct 6;142(14):1361–73. doi: 10.1161/CIRCULATIONAHA.120.046612 (PMC7531510; doi:10.1161/circulationaha.120.046612), 2020-10-06
Supplement: cir-142-1361-s002.pdf [file cir-142-1361-s002.pdf]

**SUPPLEMENTAL APPENDIX**

**Table S1. Tukey's HSD - Coronary blood flow (mL/s)**

|           | Control                     | ACP                         | SMOD                        | Straight                     | Uni-Graft                    | Valsalva                    |
|-----------|-----------------------------|-----------------------------|-----------------------------|------------------------------|------------------------------|-----------------------------|
| Control   | -                           | 1.00 (-29.3, 31.3)<br>1.00  | 5.00 (-25.3, 35.3)<br>0.99  | -9.00 (-39.3, 21.3)<br>0.93  | -6.00 (-36.3, 24.3)<br>0.99  | -1.00 (-31.3, 29.3)<br>1.00 |
| ACP       | -1.00 (-31.3, 29.3)<br>1.00 | -                           | 4.00 (-26.3, 34.3)<br>1.00  | -10.00 (-40.3, 20.3)<br>0.90 | -7.00 (-37.3, 23.3)<br>0.98  | -2.00 (-32.3, 28.3)<br>1.00 |
| SMOD      | -5.00 (-35.3, 25.3)<br>0.99 | -4.00 (-34.3, 26.3)<br>1.00 | -                           | -14.00 (-44.3, 16.3)<br>0.70 | -11.00 (-41.3, 19.3)<br>0.86 | -6.00 (-36.3, 24.3)<br>0.99 |
| Straight  | 9.00 (-21.3, 39.3)<br>0.93  | 10.00 (-20.3, 40.3)<br>0.90 | 14.00 (-16.3, 44.3)<br>0.70 | -                            | 3.00 (-27.3, 33.3)<br>1.00   | 8.00 (-22.3, 38.3)<br>0.96  |
| Uni-Graft | 6.00 (-24.3, 36.3)<br>0.99  | 7.00 (-23.3, 37.3)<br>0.98  | 11.00 (-19.3, 41.3)<br>0.86 | -3.00 (-33.3, 27.3)<br>1.00  | -                            | 5.00 (-25.3, 35.3)<br>0.99  |
| Valsalva  | 1.00 (-29.3, 31.3)<br>1.00  | 2.00 (-28.3, 32.3)<br>1.00  | 6.00 (-24.3, 36.3)<br>0.99  | -8.00 (-38.3, 22.3)<br>0.96  | -5.00 (-35.3, 25.3)<br>0.99  | -                           |

Data reported as mean difference (95% confidence interval) followed by the adjusted *p*-value for the comparison.

|                |                |                |                |                |                |                |
|----------------|----------------|----------------|----------------|----------------|----------------|----------------|
| Estimated Mean | 256.7          | 255.7          | 251.7          | 265.7          | 262.7          | 257.7          |
| (CI)           | (236.6, 276.8) | (237.3, 274.0) | (231.6, 271.8) | (245.6, 285.8) | (242.6, 282.8) | (237.6, 277.8) |

**Table S2. Tukey's HSD - Mean transaortic pressure (mmHg)**

|           | Control                          | ACP                             | SMOD                            | Straight                           | Uni-Graft                           | Valsalva                        |
|-----------|----------------------------------|---------------------------------|---------------------------------|------------------------------------|-------------------------------------|---------------------------------|
| Control   | -                                | -4.37 (-10.2, 1.4)<br>0.21      | -4.86 (-10.6, 0.9)<br>0.13      | -6.71 (-12.5, -0.9)<br><b>0.02</b> | -11.58 (-17.4, -5.8)<br><b>0.00</b> | -5.12 (-10.9, 0.7)<br>0.10      |
| ACP       | 4.37 (-1.4, 10.2)<br>0.21        | -                               | -0.49 (-6.3, 5.3)<br>1.00       | -2.34 (-8.1, 3.4)<br>0.80          | -7.21 (-13.0, -1.4)<br><b>0.01</b>  | -0.75 (-6.5, 5.0)<br>1.00       |
| SMOD      | 4.86 (-0.9, 10.6)<br>0.13        | 0.49 (-5.3, 6.3)<br>1.00        | -                               | -1.85 (-7.6, 3.9)<br>0.91          | -6.72 (-12.5, -0.9)<br><b>0.02</b>  | -0.26 (-6.0, 5.5)<br>1.00       |
| Straight  | 6.71 (0.9, 12.5)<br><b>0.02</b>  | 2.34 (-3.4, 8.1)<br>0.80        | 1.85 (-3.9, 7.6)<br>0.91        | -                                  | -4.87 (-10.6, 0.9)<br>0.13          | 1.59 (-4.2, 7.4)<br>0.95        |
| Uni-Graft | 11.58 (5.8, 17.4)<br><b>0.00</b> | 7.21 (1.4, 13.0)<br><b>0.01</b> | 6.72 (0.9, 12.5)<br><b>0.02</b> | 4.87 (-0.9, 10.6)<br>0.13          | -                                   | 6.46 (0.7, 12.2)<br><b>0.02</b> |
| Valsalva  | 5.12 (-0.7, 10.9)<br>0.10        | 0.75 (-5.0, 6.5)<br>1.00        | 0.26 (-5.5, 6.0)<br>1.00        | -1.59 (-7.4, 4.2)<br>0.95          | -6.46 (-12.2, -0.7)<br><b>0.02</b>  | -                               |

Data reported as mean difference (95% confidence interval) followed by the adjusted *p*-value for the comparison.

|                |             |             |              |              |              |              |
|----------------|-------------|-------------|--------------|--------------|--------------|--------------|
| Estimated Mean | 8.9         | 13.3        | 13.8         | 15.6         | 20.5         | 14.0         |
| (CI)           | (5.1, 12.8) | (9.8, 16.8) | (10.0, 17.6) | (11.8, 19.5) | (16.7, 24.3) | (10.2, 17.9) |

**Table S3. Tukey's HSD - Effective orifice area (cm<sup>2</sup>)**

|           | Control                           | ACP                               | SMOD                              | Straight                       | Uni-Graft                      | Valsalva                       |
|-----------|-----------------------------------|-----------------------------------|-----------------------------------|--------------------------------|--------------------------------|--------------------------------|
| Control   | -                                 | 0.66 (0.2, 1.1)<br><b>0.00</b>    | 0.72 (0.3, 1.1)<br><b>0.00</b>    | 0.94 (0.5, 1.4)<br><b>0.00</b> | 1.21 (0.8, 1.6)<br><b>0.00</b> | 0.81 (0.4, 1.2)<br><b>0.00</b> |
| ACP       | -0.66 (-1.1, -0.2)<br><b>0.00</b> | -                                 | 0.06 (-0.4, 0.5)<br>1.00          | 0.28 (-0.1, 0.7)<br>0.32       | 0.54 (0.1, 1.0)<br><b>0.01</b> | 0.15 (-0.3, 0.6)<br>0.86       |
| SMOD      | -0.72 (-1.1, -0.3)<br><b>0.00</b> | -0.06 (-0.5, 0.4)<br>1.00         | -                                 | 0.22 (-0.2, 0.6)<br>0.57       | 0.48 (0.1, 0.9)<br><b>0.02</b> | 0.09 (-0.3, 0.5)<br>0.98       |
| Straight  | -0.94 (-1.4, -0.5)<br><b>0.00</b> | -0.28 (-0.7, 0.1)<br>0.32         | -0.22 (-0.6, 0.2)<br>0.57         | -                              | 0.26 (-0.2, 0.7)<br>0.40       | -0.13 (-0.5, 0.3)<br>0.92      |
| Uni-Graft | -1.21 (-1.6, -0.8)<br><b>0.00</b> | -0.54 (-1.0, -0.1)<br><b>0.01</b> | -0.48 (-0.9, -0.1)<br><b>0.02</b> | -0.26 (-0.7, 0.2)<br>0.40      | -                              | -0.39 (-0.8, 0.0)<br>0.08      |
| Valsalva  | -0.81 (-1.2, -0.4)<br><b>0.00</b> | -0.15 (-0.6, 0.3)<br>0.86         | -0.09 (-0.5, 0.3)<br>0.98         | 0.13 (-0.3, 0.5)<br>0.92       | 0.39 (0.0, 0.8)<br>0.08        | -                              |

Data reported as mean difference (95% confidence interval) followed by the adjusted *p*-value for the comparison.

|                |            |            |            |            |            |            |
|----------------|------------|------------|------------|------------|------------|------------|
| Estimated Mean | 2.5        | 1.9        | 1.8        | 1.6        | 1.3        | 1.7        |
| (CI)           | (2.2, 2.8) | (1.6, 2.1) | (1.5, 2.1) | (1.3, 1.9) | (1.0, 1.6) | (1.4, 2.0) |

**Table S4. Tukey's HSD - Regurgitant fraction (%)**

|           | Control                        | ACP                                | SMOD                              | Straight                        | Uni-Graft                       | Valsalva                  |
|-----------|--------------------------------|------------------------------------|-----------------------------------|---------------------------------|---------------------------------|---------------------------|
| Control   | -                              | -4.74 (-9.3, -0.2)<br><b>0.04</b>  | -1.58 (-6.1, 2.9)<br>0.88         | 3.71 (-0.8, 8.2)<br>0.15        | 2.72 (-1.8, 7.2)<br>0.44        | -0.56 (-5.1, 4.0)<br>1.00 |
| ACP       | 4.74 (0.2, 9.3)<br><b>0.04</b> | -                                  | 3.16 (-1.4, 7.7)<br>0.28          | 8.45 (3.9, 13.0)<br><b>0.00</b> | 7.46 (2.9, 12.0)<br><b>0.00</b> | 4.18 (-0.4, 8.7)<br>0.08  |
| SMOD      | 1.58 (-2.9, 6.1)<br>0.88       | -3.16 (-7.7, 1.4)<br>0.28          | -                                 | 5.29 (0.8, 9.8)<br><b>0.02</b>  | 4.30 (-0.2, 8.8)<br>0.07        | 1.02 (-3.5, 5.5)<br>0.98  |
| Straight  | -3.71 (-8.2, 0.8)<br>0.15      | -8.45 (-13.0, -3.9)<br><b>0.00</b> | -5.29 (-9.8, -0.8)<br><b>0.02</b> | -                               | -0.99 (-5.5, 3.5)<br>0.98       | -4.27 (-8.8, 0.3)<br>0.07 |
| Uni-Graft | -2.72 (-7.2, 1.8)<br>0.44      | -7.46 (-12.0, -2.9)<br><b>0.00</b> | -4.30 (-8.8, 0.2)<br>0.07         | 0.99 (-3.5, 5.5)<br>0.98        | -                               | -3.28 (-7.8, 1.2)<br>0.25 |
| Valsalva  | 0.56 (-4.0, 5.1)<br>1.00       | -4.18 (-8.7, 0.4)<br>0.08          | -1.02 (-5.5, 3.5)<br>0.98         | 4.27 (-0.3, 8.8)<br>0.07        | 3.28 (-1.2, 7.8)<br>0.25        | -                         |

Data reported as mean difference (95% confidence interval) followed by the adjusted *p*-value for the comparison.

|                |             |              |             |            |             |             |
|----------------|-------------|--------------|-------------|------------|-------------|-------------|
| Estimated Mean | 10.4        | 15.1         | 12.0        | 6.7        | 7.7         | 11.0        |
| (CI)           | (7.4, 13.4) | (12.4, 17.9) | (9.0, 15.0) | (3.7, 9.7) | (4.7, 10.7) | (8.0, 14.0) |

**Table S5. Tukey's HSD - Peak root distensibility (%)**

|           | Control                            | ACP                                | SMOD                       | Straight                        | Uni-Graft                          | Valsalva                           |
|-----------|------------------------------------|------------------------------------|----------------------------|---------------------------------|------------------------------------|------------------------------------|
| Control   | -                                  | 2.66 (-2.7, 8.1)<br>0.64           | 4.78 (-0.6, 10.2)<br>0.10  | 9.82 (4.4, 15.2)<br><b>0.00</b> | 1.08 (-4.3, 6.5)<br>0.99           | 2.96 (-2.4, 8.4)<br>0.53           |
| ACP       | -2.66 (-8.1, 2.7)<br>0.64          | -                                  | 2.12 (-3.3, 7.5)<br>0.81   | 7.16 (1.8, 12.6)<br><b>0.01</b> | -1.58 (-7.0, 3.8)<br>0.94          | 0.30 (-5.1, 5.7)<br>1.00           |
| SMOD      | -4.78 (-10.2, 0.6)<br>0.10         | -2.12 (-7.5, 3.3)<br>0.81          | -                          | 5.04 (-0.4, 10.4)<br>0.08       | -3.70 (-9.1, 1.7)<br>0.30          | -1.82 (-7.2, 3.6)<br>0.89          |
| Straight  | -9.82 (-15.2, -4.4)<br><b>0.00</b> | -7.16 (-12.6, -1.8)<br><b>0.01</b> | -5.04 (-10.4, 0.4)<br>0.08 | -                               | -8.74 (-14.1, -3.3)<br><b>0.00</b> | -6.86 (-12.3, -1.5)<br><b>0.01</b> |
| Uni-Graft | -1.08 (-6.5, 4.3)<br>0.99          | 1.58 (-3.8, 7.0)<br>0.94           | 3.70 (-1.7, 9.1)<br>0.30   | 8.74 (3.3, 14.1)<br><b>0.00</b> | -                                  | 1.88 (-3.5, 7.3)<br>0.88           |
| Valsalva  | -2.96 (-8.4, 2.4)<br>0.53          | -0.30 (-5.7, 5.1)<br>1.00          | 1.82 (-3.6, 7.2)<br>0.89   | 6.86 (1.5, 12.3)<br><b>0.01</b> | -1.88 (-7.3, 3.5)<br>0.88          | -                                  |

Data reported as mean difference (95% confidence interval) followed by the adjusted *p*-value for the comparison.

|                |             |             |            |          |             |             |
|----------------|-------------|-------------|------------|----------|-------------|-------------|
| Estimated Mean | 10.6        | 7.9         | 5.8        | 0.8      | 9.5         | 7.6         |
| (CI)           | (7.0, 14.2) | (4.7, 11.2) | (2.2, 9.4) | (0, 4.4) | (5.9, 13.1) | (4.1, 11.2) |

**Table S6. Tukey's HSD - Mean cusp opening velocity (cm/s)**

|           | Control                          | ACP                                 | SMOD                               | Straight                        | Uni-Graft                          | Valsalva                           |
|-----------|----------------------------------|-------------------------------------|------------------------------------|---------------------------------|------------------------------------|------------------------------------|
| Control   | -                                | -11.07 (-15.5, -6.6)<br><b>0.00</b> | -8.45 (-12.9, -4.0)<br><b>0.00</b> | -4.43 (-8.9, 0.1)<br>0.05       | -7.81 (-12.3, -3.3)<br><b>0.00</b> | -9.36 (-13.8, -4.9)<br><b>0.00</b> |
| ACP       | 11.07 (6.6, 15.5)<br><b>0.00</b> | -                                   | 2.62 (-1.9, 7.1)<br>0.47           | 6.64 (2.2, 11.1)<br><b>0.00</b> | 3.26 (-1.2, 7.7)<br>0.24           | 1.71 (-2.8, 6.2)<br>0.83           |
| SMOD      | 8.45 (4.0, 12.9)<br><b>0.00</b>  | -2.62 (-7.1, 1.9)<br>0.47           | -                                  | 4.03 (-0.5, 8.5)<br>0.09        | 0.64 (-3.8, 5.1)<br>1.00           | -0.91 (-5.4, 3.6)<br>0.99          |
| Straight  | 4.43 (-0.1, 8.9)<br>0.05         | -6.64 (-11.1, -2.2)<br><b>0.00</b>  | -4.03 (-8.5, 0.5)<br>0.09          | -                               | -3.38 (-7.9, 1.1)<br>0.21          | -4.93 (-9.4, -0.5)<br><b>0.03</b>  |
| Uni-Graft | 7.81 (3.3, 12.3)<br><b>0.00</b>  | -3.26 (-7.7, 1.2)<br>0.24           | -0.64 (-5.1, 3.8)<br>1.00          | 3.38 (-1.1, 7.9)<br>0.21        | -                                  | -1.55 (-6.0, 2.9)<br>0.88          |
| Valsalva  | 9.36 (4.9, 13.8)<br><b>0.00</b>  | -1.71 (-6.2, 2.8)<br>0.83           | 0.91 (-3.6, 5.4)<br>0.99           | 4.93 (0.5, 9.4)<br><b>0.03</b>  | 1.55 (-2.9, 6.0)<br>0.88           | -                                  |

Data reported as mean difference (95% confidence interval) followed by the adjusted *p*-value for the comparison.

|                |              |              |              |              |              |              |
|----------------|--------------|--------------|--------------|--------------|--------------|--------------|
| Estimated Mean | 21.7         | 32.7         | 30.1         | 26.1         | 29.5         | 31.0         |
| (CI)           | (18.7, 24.6) | (30.0, 35.5) | (27.1, 33.1) | (23.1, 29.1) | (26.5, 32.4) | (28.1, 34.0) |

**Table S7. Tukey's HSD - Relative cusp opening force**

|           | Control                        | ACP                               | SMOD                              | Straight                       | Uni-Graft                 | Valsalva                          |
|-----------|--------------------------------|-----------------------------------|-----------------------------------|--------------------------------|---------------------------|-----------------------------------|
| Control   | -                              | -0.65 (-1.0, -0.3)<br><b>0.00</b> | -0.67 (-1.1, -0.3)<br><b>0.00</b> | -0.19 (-0.6, 0.2)<br>0.61      | -0.32 (-0.7, 0.1)<br>0.14 | -0.60 (-1.0, -0.2)<br><b>0.00</b> |
| ACP       | 0.65 (0.3, 1.0)<br><b>0.00</b> | -                                 | -0.02 (-0.4, 0.4)<br>1.00         | 0.46 (0.1, 0.8)<br><b>0.01</b> | 0.34 (-0.1, 0.7)<br>0.10  | 0.06 (-0.3, 0.4)<br>1.00          |
| SMOD      | 0.67 (0.3, 1.1)<br><b>0.00</b> | 0.02 (-0.4, 0.4)<br>1.00          | -                                 | 0.48 (0.1, 0.9)<br><b>0.01</b> | 0.35 (0.0, 0.7)<br>0.08   | 0.07 (-0.3, 0.5)<br>0.99          |
| Straight  | 0.19 (-0.2, 0.6)<br>0.61       | -0.46 (-0.8, -0.1)<br><b>0.01</b> | -0.48 (-0.9, -0.1)<br><b>0.01</b> | -                              | -0.12 (-0.5, 0.3)<br>0.91 | -0.40 (-0.8, 0.0)<br><b>0.03</b>  |
| Uni-Graft | 0.32 (-0.1, 0.7)<br>0.14       | -0.34 (-0.7, 0.1)<br>0.10         | -0.35 (-0.7, 0.0)<br>0.08         | 0.12 (-0.3, 0.5)<br>0.91       | -                         | -0.28 (-0.7, 0.1)<br>0.23         |
| Valsalva  | 0.60 (0.2, 1.0)<br><b>0.00</b> | -0.06 (-0.4, 0.3)<br>1.00         | -0.07 (-0.5, 0.3)<br>0.99         | 0.40 (0.0, 0.8)<br><b>0.03</b> | 0.28 (-0.1, 0.7)<br>0.23  | -                                 |

Data reported as mean difference (95% confidence interval) followed by the adjusted *p*-value for the comparison.

|                |            |            |            |            |            |            |
|----------------|------------|------------|------------|------------|------------|------------|
| Estimated Mean | 1.3        | 2.0        | 2.0        | 1.5        | 1.6        | 1.9        |
| (CI)           | (1.0, 1.6) | (1.7, 2.2) | (1.7, 2.2) | (1.3, 1.8) | (1.4, 1.9) | (1.7, 2.2) |

**Table S8. Tukey's HSD - Mean cusp closing velocity (cm/s)**

|           | Control                        | ACP                               | SMOD                              | Straight                       | Uni-Graft                         | Valsalva                          |
|-----------|--------------------------------|-----------------------------------|-----------------------------------|--------------------------------|-----------------------------------|-----------------------------------|
| Control   | -                              | -6.76 (-8.4, -5.2)<br><b>0.00</b> | -6.04 (-7.6, -4.4)<br><b>0.00</b> | -0.60 (-2.2, 1.0)<br>0.85      | -2.60 (-4.2, -1.0)<br><b>0.00</b> | -5.65 (-7.3, -4.0)<br><b>0.00</b> |
| ACP       | 6.76 (5.2, 8.4)<br><b>0.00</b> | -                                 | 0.73 (-0.9, 2.3)<br>0.72          | 6.17 (4.6, 7.8)<br><b>0.00</b> | 4.17 (2.6, 5.8)<br><b>0.00</b>    | 1.11 (-0.5, 2.7)<br>0.29          |
| SMOD      | 6.04 (4.4, 7.6)<br><b>0.00</b> | -0.73 (-2.3, 0.9)<br>0.72         | -                                 | 5.44 (3.8, 7.0)<br><b>0.00</b> | 3.44 (1.8, 5.0)<br><b>0.00</b>    | 0.39 (-1.2, 2.0)<br>0.97          |
| Straight  | 0.60 (-1.0, 2.2)<br>0.85       | -6.17 (-7.8, -4.6)<br><b>0.00</b> | -5.44 (-7.0, -3.8)<br><b>0.00</b> | -                              | -2.00 (-3.6, -0.4)<br><b>0.01</b> | -5.05 (-6.7, -3.4)<br><b>0.00</b> |
| Uni-Graft | 2.60 (1.0, 4.2)<br><b>0.00</b> | -4.17 (-5.8, -2.6)<br><b>0.00</b> | -3.44 (-5.0, -1.8)<br><b>0.00</b> | 2.00 (0.4, 3.6)<br><b>0.01</b> | -                                 | -3.05 (-4.7, -1.4)<br><b>0.00</b> |
| Valsalva  | 5.65 (4.0, 7.3)<br><b>0.00</b> | -1.11 (-2.7, 0.5)<br>0.29         | -0.39 (-2.0, 1.2)<br>0.97         | 5.05 (3.4, 6.7)<br><b>0.00</b> | 3.05 (1.4, 4.7)<br><b>0.00</b>    | -                                 |

Data reported as mean difference (95% confidence interval) followed by the adjusted *p*-value for the comparison.

|                |             |              |              |             |              |              |
|----------------|-------------|--------------|--------------|-------------|--------------|--------------|
| Estimated Mean | 9.1         | 15.9         | 15.1         | 9.7         | 11.7         | 14.8         |
| (CI)           | (8.0, 10.2) | (14.9, 16.8) | (14.1, 16.2) | (8.6, 10.8) | (10.6, 12.8) | (13.7, 15.8) |

**Table S9. Tukey's HSD - Relative cusp closing force**

|           | Control                         | ACP                                | SMOD                              | Straight                        | Uni-Graft                      | Valsalva                          |
|-----------|---------------------------------|------------------------------------|-----------------------------------|---------------------------------|--------------------------------|-----------------------------------|
| Control   | -<br><b>0.00</b>                | -7.54 (-11.0, -4.1)<br><b>0.00</b> | -6.00 (-9.5, -2.5)<br><b>0.00</b> | -0.81 (-4.3, 2.7)<br>0.98       | -3.12 (-6.6, 0.4)<br>0.10      | -4.79 (-8.3, -1.3)<br><b>0.00</b> |
| ACP       | 7.54 (4.1, 11.0)<br><b>0.00</b> | -                                  | 1.54 (-1.9, 5.0)<br>0.73          | 6.73 (3.2, 10.2)<br><b>0.00</b> | 4.42 (0.9, 7.9)<br><b>0.01</b> | 2.74 (-0.7, 6.2)<br>0.18          |
| SMOD      | 6.00 (2.5, 9.5)<br><b>0.00</b>  | -1.54 (-5.0, 1.9)<br>0.73          | -                                 | 5.19 (1.7, 8.7)<br><b>0.00</b>  | 2.88 (-0.6, 6.4)<br>0.14       | 1.21 (-2.3, 4.7)<br>0.88          |
| Straight  | 0.81 (-2.7, 4.3)<br>0.98        | -6.73 (-10.2, -3.2)<br><b>0.00</b> | -5.19 (-8.7, -1.7)<br><b>0.00</b> | -                               | -2.31 (-5.8, 1.2)<br>0.33      | -3.98 (-7.5, -0.5)<br><b>0.02</b> |
| Uni-Graft | 3.12 (-0.4, 6.6)<br>0.10        | -4.42 (-7.9, -0.9)<br><b>0.01</b>  | -2.88 (-6.4, 0.6)<br>0.14         | 2.31 (-1.2, 5.8)<br>0.33        | -                              | -1.67 (-5.1, 1.8)<br>0.66         |
| Valsalva  | 4.79 (1.3, 8.3)<br><b>0.00</b>  | -2.74 (-6.2, 0.7)<br>0.18          | -1.21 (-4.7, 2.3)<br>0.88         | 3.98 (0.5, 7.5)<br><b>0.02</b>  | 1.67 (-1.8, 5.1)<br>0.66       | -                                 |

Data reported as mean difference (95% confidence interval) followed by the adjusted *p*-value for the comparison.

|                |             |             |            |             |            |            |
|----------------|-------------|-------------|------------|-------------|------------|------------|
| Estimated Mean | 0.6         | 8.2         | 6.6        | 1.4         | 3.8        | 5.4        |
| (CI)           | (-1.7, 2.9) | (6.1, 10.3) | (4.3, 8.9) | (-0.9, 3.8) | (1.4, 6.1) | (3.1, 7.7) |

### Video Legend

**Video 1.** En face high-speed videometric view of a valve within each conduit over one cardiac cycle.
